# Supplementary material for: Dataset of antiarch placoderms (the most basal jawed vertebrates) throughout Middle Paleozoic
Source: Copernicus journal article supplement (doi:10.5194/essd-2021-394), 2022-01-07
Supplement: Supplementary file 1 [file essd-2021-394-supplement.pdf]

| Genus                     | Species                              | Specimens |
|---------------------------|--------------------------------------|-----------|
| <i>Asterolepis</i>        | <i>Asterolepis alticristata</i>      | 54        |
|                           | <i>Asterolepis amulensis</i>         | 1         |
|                           | <i>Asterolepis chadwicki</i>         | 1         |
|                           | <i>Asterolepis dellei</i>            | 4         |
|                           | <i>Asterolepis essica</i>            | 8         |
|                           | <i>Asterolepis estonica</i>          | 5         |
|                           | <i>Asterolepis maxima</i>            | 1         |
|                           | <i>Asterolepis orcadensis</i>        | 16        |
|                           | <i>Asterolepis ornata</i>            | 49        |
|                           | <i>Asterolepis radiata</i>           | 22        |
|                           | <i>Asterolepis scabra</i>            | 44        |
|                           | <i>Asterolepis sinensis</i>          | 1         |
|                           | <i>Asterolepis sp.</i>               | 40        |
|                           | <i>Asterolepis syasiensis</i>        | 6         |
|                           | <i>Asterolepis thule</i>             | 4         |
| <i>Bothriolepis</i>       | <i>Bothriolepis africana</i>         | 9         |
|                           | <i>Bothriolepis alexi</i>            | 7         |
|                           | <i>Bothriolepis alvesiensis</i>      | 4         |
|                           | <i>Bothriolepis amankonyrica</i>     | 5         |
|                           | <i>Bothriolepis askinae</i>          | 1         |
|                           | <i>Bothriolepis askini</i>           | 234       |
|                           | <i>Bothriolepis babichevi</i>        | 15        |
|                           | <i>Bothriolepis barretti</i>         | 4         |
|                           | <i>Bothriolepis bindareei</i>        | 5         |
|                           | <i>Bothriolepis canadensis</i>       | 26        |
|                           | <i>Bothriolepis cellulosa</i>        | 55        |
|                           | <i>Bothriolepis ciecere</i>          | 630       |
|                           | <i>Bothriolepis coloradensis</i>     | 2         |
|                           | <i>Bothriolepis cristata</i>         | 5         |
|                           | <i>Bothriolepis cullodenensis</i>    | 92        |
|                           | <i>Bothriolepis curonica</i>         | 125       |
|                           | <i>Bothriolepis darbiensis</i>       | 2         |
|                           | <i>Bothriolepis dorakarasugensis</i> | 13        |
|                           | <i>Bothriolepis evaldi</i>           | 113       |
|                           | <i>Bothriolepis fergusoni</i>        | 6         |
|                           | <i>Bothriolepis gigantea</i>         | 30        |
|                           | <i>Bothriolepis gippslandiensis</i>  | 73        |
|                           | <i>Bothriolepis grenfellensis</i>    | 50        |
|                           | <i>Bothriolepis hayi</i>             | 60        |
|                           | <i>Bothriolepis heckeri</i>          | 4         |
|                           | <i>Bothriolepis hicklingi</i>        | 23        |
|                           | <i>Bothriolepis hydrophila</i>       | 14        |
|                           | <i>Bothriolepis jani</i>             | 119       |
|                           | <i>Bothriolepis jazwicensis</i>      | 1         |
|                           | <i>Bothriolepis karawaka</i>         | 11        |
|                           | <i>Bothriolepis kassini</i>          | 12        |
| <i>Bothriolepis kohni</i> | 8                                    |           |

|                                    |                                       |     |
|------------------------------------|---------------------------------------|-----|
| <i>Bothriolepis</i>                | <i>Bothriolepis laverocklochensis</i> | 1   |
|                                    | <i>Bothriolepis leptocheira</i>       | 207 |
|                                    | <i>Bothriolepis lohesti</i>           | 26  |
|                                    | <i>Bothriolepis longi</i>             | 133 |
|                                    | <i>Bothriolepis macphersoni</i>       | 5   |
|                                    | <i>Bothriolepis major</i>             | 2   |
|                                    | <i>Bothriolepis markovskii</i>        | 7   |
|                                    | <i>Bothriolepis mawsoni</i>           | 12  |
|                                    | <i>Bothriolepis maxima</i>            | 200 |
|                                    | <i>Bothriolepis nikitinae</i>         | 4   |
|                                    | <i>Bothriolepis nitida</i>            | 10  |
|                                    | <i>Bothriolepis niushoushanensis</i>  | 33  |
|                                    | <i>Bothriolepis obesa</i>             | 6   |
|                                    | <i>Bothriolepis obrutschewi</i>       | 419 |
|                                    | <i>Bothriolepis ornata</i>            | 172 |
|                                    | <i>Bothriolepis panderi</i>           | 8   |
|                                    | <i>Bothriolepis paradoxa</i>          | 24  |
|                                    | <i>Bothriolepis perija</i>            | 26  |
|                                    | <i>Bothriolepis portalensis</i>       | 152 |
|                                    | <i>Bothriolepis prima</i>             | 71  |
|                                    | <i>Bothriolepis rex</i>               | 84  |
|                                    | <i>Bothriolepis sanzarensis</i>       | 4   |
|                                    | <i>Bothriolepis sibirica</i>          | 12  |
|                                    | <i>Bothriolepis sinensis</i>          | 33  |
|                                    | <i>Bothriolepis sosnensis</i>         | 6   |
|                                    | <i>Bothriolepis sp.</i>               | 219 |
|                                    | <i>Bothriolepis stevensoni</i>        | 5   |
|                                    | <i>Bothriolepis tastenica</i>         | 15  |
|                                    | <i>Bothriolepis tatongensis</i>       | 6   |
|                                    | <i>Bothriolepis taylori</i>           | 19  |
|                                    | <i>Bothriolepis trautscholdi</i>      | 427 |
|                                    | <i>Bothriolepis tungseni</i>          | 6   |
| <i>Bothriolepis turanica</i>       | 1                                     |     |
| <i>Bothriolepis verrucosa</i>      | 98                                    |     |
| <i>Bothriolepis virginienensis</i> | 1                                     |     |
| <i>Bothriolepis volongensis</i>    | 50                                    |     |
| <i>Bothriolepis vuwae</i>          | 14                                    |     |
| <i>Bothriolepis warreni</i>        | 11                                    |     |
| <i>Bothriolepis wilsoni</i>        | 6                                     |     |
| <i>Bothriolepis yeungae</i>        | 143                                   |     |
| <i>Bothriolepis yunnanensis</i>    | 4                                     |     |
| <i>Bothriolepis zadonica</i>       | 22                                    |     |
| <i>Byssacanthus</i>                | <i>Byssacanthus sp.</i>               | 1   |
| <i>Chuanbeiolepis</i>              | <i>Chuanbeiolepis jiangyouensis</i>   | 1   |
| <i>Chuchinolepis</i>               | <i>Chuchinolepis ? sp.</i>            | 4   |
|                                    | <i>Chuchinolepis dongmoensis</i>      | 28  |
|                                    | <i>Chuchinolepis gracilis</i>         | 28  |
|                                    | <i>Chuchinolepis qujingensis</i>      | 38  |

|                           |                                        |     |
|---------------------------|----------------------------------------|-----|
|                           | <i>Chuchinolepis robusta</i>           | 1   |
|                           | <i>Chuchinolepis sulcata</i>           | 10  |
| <i>Colombialepis</i>      | <i>Colombialepis villarroeli</i>       | 13  |
| <i>Dayaoshania</i>        | <i>Dayaoshania youngi</i>              | 5   |
| <i>Dianolepis</i>         | <i>Dianolepis liui</i>                 | 2   |
| <i>Eoantiarchilepis</i>   | <i>Eoantiarchilepis xitunensis</i>     | 1   |
| <i>Gerdalepis</i>         | <i>Gerdalepis jesseni</i>              | 2   |
| <i>Grammaspis</i>         | <i>Grammaspis callima</i>              | 1   |
| <i>Grenfellaspis</i>      | <i>Grenfellaspis branagani</i>         | 114 |
| <i>Grossilepis</i>        | <i>Grossilepis brandi</i>              | 7   |
|                           | <i>Grossilepis rikiki</i>              | 37  |
|                           | <i>Grossilepis spinosa</i>             | 2   |
|                           | <i>Grossilepis tuberculata</i>         | 16  |
| <i>Heteroyunnanolepis</i> | <i>Heteroyunnanolepis qujingensis</i>  | 18  |
| <i>Hohsienolepis</i>      | <i>Hohsienolepis hsintuensis</i>       | 2   |
| <i>Houershanaspis</i>     | <i>Houershanaspis zhangii</i>          | 1   |
| <i>Hunanolepis</i>        | <i>Hunanolepis tieni</i>               | 26  |
| <i>Hyrceanaspis</i>       | <i>Hyrceanaspis bliecki</i>            | 9   |
| <i>Jiangxilepis</i>       | <i>Jiangxilepis longibrachius</i>      | 26  |
| <i>Kirgisolepis</i>       | <i>Kirgisolepis karabaltaensis</i>     | 1   |
| <i>Lianhuashanolepis</i>  | <i>Lianhuashanolepis Liukiangensis</i> | 5   |
| <i>Liujiangolepis</i>     | <i>Liujiangolepis suni</i>             | 4   |
| <i>Livnolepis</i>         | <i>Livnolepis heckeri</i>              | 1   |
|                           | <i>Livnolepis zadonica</i>             | 9   |
| <i>Luquanolepis</i>       | <i>Luquanolepis pileos</i>             | 8   |
| <i>Merimbulaspis</i>      | <i>Merimbulaspis meemannae</i>         | 5   |
|                           | <i>Microbrachius chuandongensis</i>    | 10  |
|                           | <i>Microbrachius dicki</i>             | 38  |
|                           | <i>Microbrachius kedoe</i>             | 22  |
|                           | <i>Microbrachius sinensis</i>          | 8   |
|                           | <i>Microbrachius sp.</i>               | 10  |
| <i>Minicrania</i>         | <i>Minicrania lirouyii</i>             | 44  |
|                           | <i>Minicrania lissa</i>                | 3   |
|                           | <i>Minicrania sp.</i>                  | 2   |
| <i>Mizia</i>              | <i>Mizia longhuaensis</i>              | 1   |
|                           | <i>Mizia parvus</i>                    | 6   |
| <i>Nawagiaspis</i>        | <i>Nawagiaspis wadeae</i>              | 1   |
| <i>Ningxialepis</i>       | <i>Ningxialepis spinosa</i>            | 1   |
| <i>Orientolepis</i>       | <i>Orientolepis neokwangsiensis</i>    | 1   |
| <i>Pambulaspis</i>        | <i>Pambulaspis antarctica</i>          | 2   |
|                           | <i>Pambulaspis cobandrahensis</i>      | 8   |
| <i>Parayunnanolepis</i>   | <i>Parayunnanolepis xitunensis</i>     | 6   |
| <i>Phymolepis</i>         | <i>Phymolepis cuifengshanensis</i>     | 27  |
|                           | <i>Phymolepis guoruii</i>              | 10  |
| <i>Pterichthyodes</i>     | <i>Pterichthyodes milleri</i>          | 65  |
|                           | <i>Remigolepis armata</i>              | 41  |
|                           | <i>Remigolepis durnalensis</i>         | 31  |
|                           | <i>Remigolepis karakoliensis</i>       | 1   |

|                           |                                         |    |
|---------------------------|-----------------------------------------|----|
| <i>Remigolepis</i>        | <i>Remigolepis major</i>                | 4  |
|                           | <i>Remigolepis microcephala</i>         | 6  |
|                           | <i>Remigolepis redcliffensis</i>        | 33 |
|                           | <i>Remigolepis sp.</i>                  | 16 |
|                           | <i>Remigolepis suusamyrensis</i>        | 1  |
|                           | <i>Remigolepis walkeri</i>              | 40 |
|                           | <i>Remigolepis xiangshanensis</i>       | 24 |
|                           | <i>Remigolepis xixiaensis</i>           | 5  |
|                           | <i>Remigolepis zhongningensis</i>       | 11 |
|                           | <i>Remigolepis zhongweiensis</i>        | 23 |
| <i>Rossolepis</i>         | <i>Rossolepis brodensis</i>             | 1  |
| <i>Sherbonaspis</i>       | <i>Sherbonaspis hillsi</i>              | 59 |
| <i>Shimenolepis</i>       | <i>Shimenolepis graniferus</i>          | 1  |
| <i>Sinolepis</i>          | <i>Sinolepis macrocephala</i>           | 5  |
|                           | <i>Sinolepis szei</i>                   | 6  |
| <i>Songdalepis</i>        | <i>Songdalepis pustulata</i>            | 2  |
| <i>Stegolepis</i>         | <i>Stegolepis jugata</i>                | 8  |
|                           | <i>Stegolepis tuberculata</i>           | 11 |
| <i>Tenizolepis</i>        | <i>Tenizolepis asiatica</i>             | 19 |
|                           | <i>Tenizolepis bychkovi</i>             | 8  |
|                           | <i>Tenizolepis rara</i>                 | 21 |
| <i>Tsuifengshanolepis</i> | <i>Tsuifengshanolepis diantungensis</i> | 3  |
| <i>Tubalepis</i>          | <i>Tubalepis extensa</i>                | 17 |
| <i>Vanchienolepis</i>     | <i>Vanchienolepis langsonensis</i>      | 15 |
|                           | <i>Vanchienolepis sp.</i>               | 1  |
| <i>Venezuelepis</i>       | <i>Venezuelepis antarctica</i>          | 4  |
|                           | <i>Venezuelepis mingui</i>              | 4  |
| <i>Vietnamaspis</i>       | <i>Vietnamaspis trii</i>                | 8  |
| <i>Vukhuclepis</i>        | <i>Vukhuclepis lyhoaensis</i>           | 18 |
| <i>Walterilepis</i>       | <i>Walterilepis speciosa</i>            | 22 |
| <i>Wudinolepis</i>        | <i>Wudinolepis weni</i>                 | 4  |
| <i>Wufengshania</i>       | <i>Wufengshania magniforaminis</i>      | 2  |
| <i>Wurungulepis</i>       | <i>Wurungulepis denisoni</i>            | 2  |
| <i>Xichonolepis</i>       | <i>Xichonolepis qujingensis</i>         | 32 |
|                           | <i>Xichonolepis sp.</i>                 | 1  |
| <i>Yunnanolepis</i>       | <i>Yunnanolepis bacboensis</i>          | 4  |
|                           | <i>Yunnanolepis chii</i>                | 48 |
|                           | <i>Yunnanolepis deprati</i>             | 4  |
|                           | <i>Yunnanolepis meemannae</i>           | 1  |
|                           | <i>Yunnanolepis porifera</i>            | 18 |
|                           | <i>Yunnanolepis sp.</i>                 | 12 |
|                           | <i>Yunnanolepis spinulosa</i>           | 4  |
| <i>Zhanjilepis</i>        | <i>Zhanjilepis aspratilis</i>           | 15 |
