# Supplementary material for: Dataset of antiarch placoderms (the most basal jawed vertebrates) throughout Middle Paleozoic
Source: Copernicus journal article supplement (doi:10.5194/essd-2021-394), 2022-01-07
Supplement: Supplementary file [file essd-2021-394-CC3-supplement.pdf]

# Dataset of antiarch placoderms (the most basal jawed vertebrates) throughout Middle Paleozoic

Zhaohui Pan<sup>1\*</sup>, Zhibin Niu<sup>2\*</sup>, Zumin Xian<sup>3</sup>, Min Zhu<sup>1,4,5</sup>

<sup>1</sup> Key Laboratory of Vertebrate Evolution and Human Origins of Chinese Academy of Sciences, Institute of Vertebrate Paleontology and Paleoanthropology, Chinese Academy of Sciences, Beijing 100044

<sup>2</sup> College of Intelligence and Computing, Tianjin University, Tianjin 300350,

<sup>3</sup> Institute of Palaeontology, Yunnan Key Laboratory of Earth System Science, Yunnan University, Kunming 650500

<sup>4</sup> CAS Center for Excellence in Life and Paleoenvironment, Beijing 100044

<sup>5</sup> University of Chinese Academy of Sciences, Beijing 100049

\*These authors contributed equally to this work.

*Correspondence to:* Min Zhu (zhumin@ivpp.ac.cn)

**Abstract.** Antiarch placoderms, the most basal jawed vertebrates, have the potential to enlighten the origin of the last common ancestor of jawed vertebrates. Quantitative study based on credible data is more convincing than qualitative study. To reveal the antiarch distribution in space and time, we created a comprehensive structured dataset of antiarchs comprising 64 genera and 6025 specimens. This dataset, which includes associated chronological and geographic information, is derived from the DeepBone database. We implemented the paleogeographic map marker to visualize the biogeography of antiarchs. The comprehensive dataset of Antiarcha allows us to generate its biodiversity and variation rate changes throughout its duration. Structured data of antiarchs has tremendous research potential, including testing hypotheses in the fields of biodiversity changes, distribution, differentiation, population and community composition. Also, it will be easily accessible by the other tools to generate new understanding on the evolution of early vertebrates. The data file described in this paper is available on <https://doi.org/10.5281/zenodo.5639529> (Pan and Zhu, 2021).

## 1 Introduction

Placodermi is an extinct grade of jawed vertebrates that first occurred in the Silurian and then dominated the Devonian (Carr, 1995; Young, 2010). Recent prevailing phylogenetic hypotheses placed Placodermi as jawed stem-Gnathostomata that is sister to crown-Gnathostomata or modern jawed vertebrates (Brazeau, 2009; Davis et al., 2012; Dupret et al., 2014; Giles et al., 2015; King, 2021; Long et al., 2015;

30 Qiao et al., 2016; Trinajstić et al., 2015; Zhu et al., 2013, 2016). In this scenario, Antiarcha has usually  
been placed at the most basal position in the Placodermi (Fig. 1), representing the most basal jawed  
vertebrates. The geospatial-temporal distribution of Antiarcha will thus help us understand the origin and  
early evolution of jawed vertebrates. Historically, antiarchs resided in a variety of paleo-environments  
across all paleo-continent, including marine and freshwater environments close to shore. Moreover,  
35 Antiarcha was a diverse and successful group within Placodermi throughout Middle Paleozoic from the  
late Silurian to the end of Devonian (Denison, 1978; Janvier, 1996; Zhao et al., 2016; Zhu, 1996) to allow  
the inference of biogeographic assumptions (Ritchie et al., 1992; Young, 1984b). As a successful  
vertebrate group during the Devonian, Antiarcha has much contributed to the Devonian stratigraphic  
correlation. For instance, the biozonation of East Baltic and southern East Antarctica Devonian  
40 succession is partly based upon the antiarchs *Bothriolepis*, *Asterolepis*, and *Pambulaspis* (Young, 1974,  
1988). Lukševičs (1996) identified 14 bothriolepid species (12 *Bothriolepis* and 2 *Grossilepis*) in the  
Frasnian-Famennian formations of the East European Platform, proposed nine antiarch assemblages, and  
set up the most detailed zonation of the Main Devonian Field. However, Blicek et al. (2000) reminded  
that *Asterolepis*, *Bothriolepis*, and *Remigolepis*, which have different stratigraphic distributions on  
45 different continents, must be used with caution for long-distance correlation.

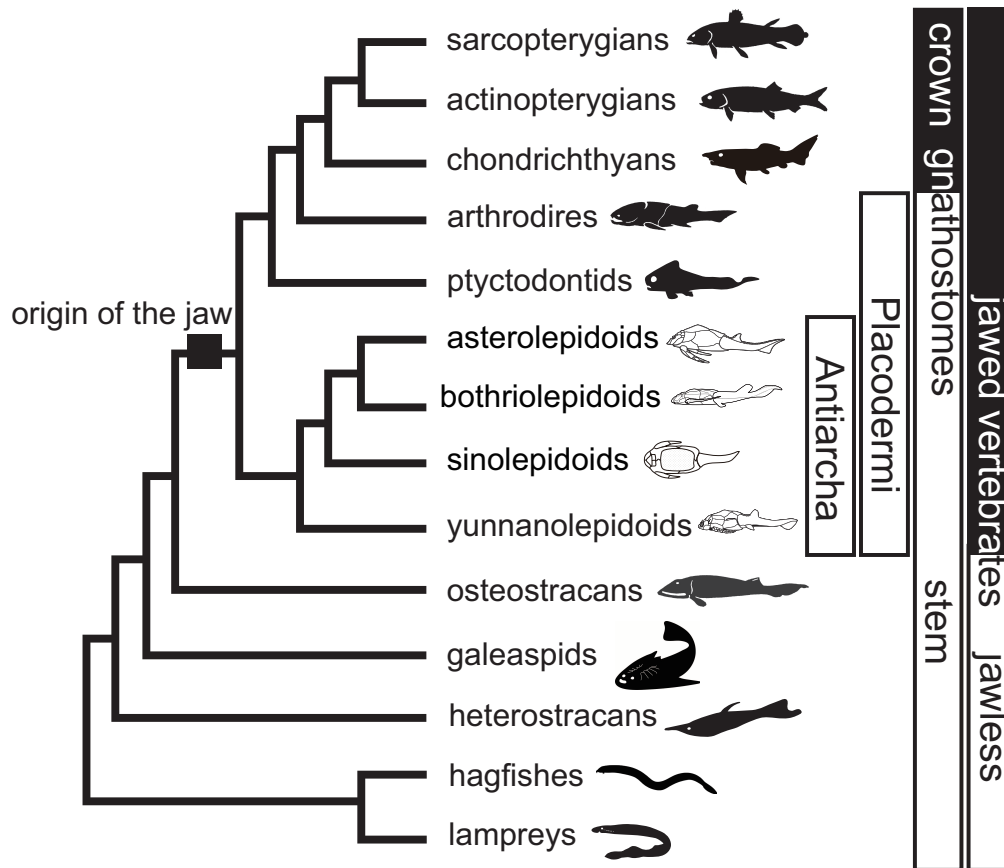

**Figure 1** Phylogenetic relationships of major early vertebrate groups from Qiao et al. (2016) and Pan et al. (2018). Line drawings indicate groups of the Antiarcha. Silhouettes indicate the other vertebrate groups. The black cube on the cladogram points to the origin of the jaw.

50 Collecting and visualizing the data of Antiarcha is the prerequisite to explaining the spatial and temporal distribution of early vertebrates. With the help of data visualization, we could gain a better understanding of the biogeographic exchange of early vertebrates. Although Zigaite and Blicek (2013) advocated a quantitative analysis to define biogeographic patterns of early vertebrates, there is still lacking efficient quantitative analysis to understand the dispersal of early vertebrates. This occurs mostly because no

55 comprehensive data collection of early vertebrates was accomplished. The disadvantage of unstructured data are clear: the absence of schema and structure makes them difficult to manage, and the lack of predefined attributes makes them difficult to be reused or extended.

The main objective of this study is to present an unprecedented structured dataset of Antiarcha that potentially facilitates the research of the geospatial distribution patterns for antiarchs and the quantitative

60 study on early vertebrates. This dataset is online open-sharing, which means that it follows the FAIR (findability, accessibility, interoperability, and reusability) guiding principles for scientific data

management and stewardship. FAIR will not only maximize the usage of data but also keep it updated with new publications. In contrast to the unstructured data, this standardized dataset is much easier to access by tools and interpret by analysis. This dataset is the first step to accomplish the global coverage of the vertebrate fossil dataset to analyze the Middle Paleozoic biogeography and paleogeography. Revealing the distribution of antiarchs in the paleomap background with reference to the global paleogeographic reconstructions of Scotese (2002), our preliminary results can be used to test the hypothesis of paleogeographic reconstructions.

## 2. Method

### 2.1 Overview

To facilitate the quantitative study and simulation analysis on early vertebrates, we are looking forward to a comprehensive database. Sallan et al. (2018) pointed out that a lack of early vertebrate fossil data has limited quantitative approaches, and hindered the resolution of issues in vertebrate evolution. With the implementation of a project entitled “Big Earth Data Science Engineering (CASEarth)” in the Strategic Priority Research Program since 2018 (Guo, 2017), we build the DeepBone database. Via three years of efforts conscientiously, the data of DeepBone database already has reached a certain scale. With continuously refining data, the Antiarcha dataset in the DeepBone database is the most comprehensive dataset endorsed by Chinese researchers in the Institute of Vertebrate Paleontology and Paleoanthropology, Chinese Academy of Sciences. The Antiarcha dataset differs from the other datasets in its basic unit, which is the specimen ID coupled with the occurrence and other detailed data. All the specimens are referenced to taxa and literature. Because the Antiarcha dataset was designed as a vertebrate paleontological dataset and its input format was designed as specimen-based, data entry assistants input the metadata according to the published specimen or virtual specimen. The literature on classic systematic paleontology always has real specimens. When it handled stratigraphic topics, the authors usually cited fossil records instead of real specimens. We introduced virtual specimens to store the taxon information in this kind of literature containing no real specimens.

Since there is no satisfactory approach that could automatically extract the paleontological data from the literature, we have recruited several data entry assistants including relevant researchers, master’s and

90 Ph.D. students to collect and curate the data. In order to guarantee the quality of the data, we have designed a four-step data processing procedure (Fig. 2):

1. Data source by an experienced expert who got his PhD degree on early vertebrates.
2. The data entry assistants read the related references, extract the antiarch placoderm data and fill them into the online record file under the supervision of experts.
- 95 3. Experts review and clean the data according to the references to implement quality control.
4. Further data examinations by senior experts to guarantee the data quality.
5. Data visualization and open access. This step is to provide a better user interface to help disseminate the dataset.

Next, we provide more details of the data processing and visualization.

100

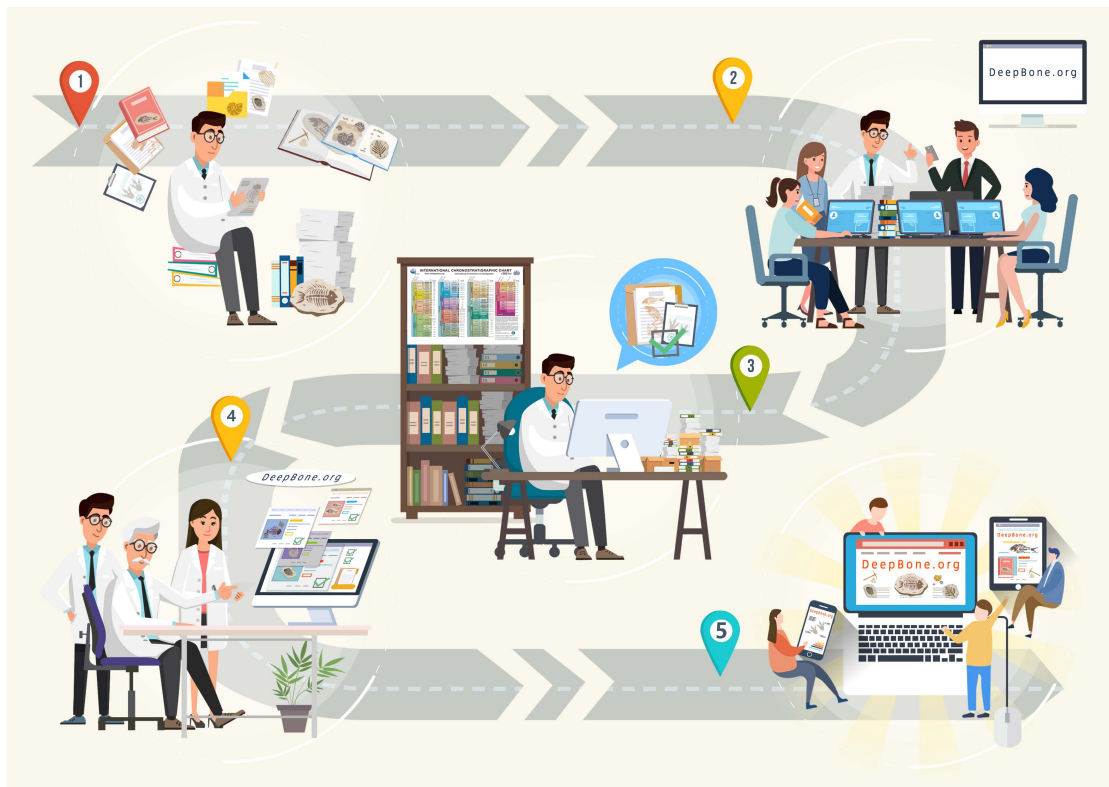

**Figure 2 Workflow of the data processing. Even the web data entry system could be accessed by any registered users, we have recruited several data entry assistants to enrich the data following the standardized workflow.**

- 105 1, collecting and sifting lectures by experienced experts. 2, data entry assistants digitalize paleontological descriptions from the page into the DeepBone database. 3, experts who are accountable for data review and cleaning the data according to the references to implement quality control. 4, associated senior researchers

review the data. 5, data managers release the data to the public

## 2.2 Data Source

110 We invite researchers who have a good reputation in the research scope to sift published literature from  
the bibliography of the paleontology journals and books. The main journals include *Alcheringa*, *Acta*  
*Geologica Polonica*, *Bulletin of the Geological Society of China*, *Estonian Journal of Earth Sciences*,  
*Journal of Vertebrate Paleontology*, *Journal of Paleontology*, *Palaeontologia Electronica*, *Palaeontology*,  
*Palaeoworld*, and *Vertebrata Palasiatica*. Totally, we have collected 126 publications, which span from  
115 the year 1939 to the year 2021. The satisfactory literature should include an accurate description or  
revision on specimen and taxon. We accepted the latest peer-reviewed literature to deal with the  
inconsistent descriptions.

## 2.3 Data Processing and Quality Control

We have made a tailored web page that provides a better user interface for them to fill in the rows of  
120 paleontological data. After that, the data would be reviewed by the other related experts so that a  
researcher could quickly access them to perform quantitative analysis reliably (Fig. 2). This workflow  
was learned from the Geobiodiversity Database (GBDB) (Xu et al., 2020). Almost all antiarch literature  
was published in English, Russian, French, German, and Chinese. Data entry assistance structure could  
handle the literature in Chinese and English well. Literature in French, Russian, and German was dealt  
125 with by paleontology postgraduates who know well these languages.

## 2.4 Data Visualization

The visualization is conducted on the raster tile form paleomaps (Scotese, 1998, 2016). We first convert  
the excavation locations from current GPS to paleo-GPS using TrackPoint software (Ke et al., 2016;  
Scotese, 2002). However, the construction of paleontological maps for visualization is based on  
130 paleomaps. Thus, we convert these latitude and longitude coordinates into pixel coordinates of raster tile  
maps using the Web Mercator algorithm. The Web Mercator algorithm is a variant of the Mercator  
projection and the de facto standard for Web mapping applications (Battersby et al., 2014). Specifically,  
the projection can be modelled as:

$$\begin{cases} x = a * \theta \\ y = a * \ln \tan\left(\frac{\pi}{4} + \frac{\varphi}{2}\right) \end{cases}$$

135 Where  $a$  is the long axis of the earth;  $\theta$  is the longitude in radians, the value range is  $[-\pi, \pi]$ , the east longitude is positive and the west longitude is negative;  $\varphi$  is the latitude, the value range is  $[-\pi/2, \pi/2]$ , north latitude is positive and south latitude is negative.

As for the paleomap, we also need to consider the map scaling and canvas size, so the final formula used is as follows:

$$140 \begin{cases} x_i = l * \theta * 2^{n-1} \\ y_i = l * \ln \tan\left(\frac{\pi}{4} + \frac{\varphi}{2}\right) * 2^{n-1} + m * (i - 1) \end{cases}$$

Where  $l$  is the length of the plane map;  $n$  is the size of the zoom scale,  $n \in N^*$ ; in the analysis of geological periods,  $i$  is taken as 1; in the analysis of cross-geological periods,  $i$  represents the  $i$ -th geological period,  $(x_i, y_i)$  are the pixel coordinates of the node in the  $i$ -th geological period, and  $m$  is the fixed pixel distance between the map centers of adjacent geological periods.

## 145 2.5 Biodiversity Visualization

We calculate the genus and species biodiversity and plot it as a bar map based on the quantity of genera and species. To better view the results, we utilize the kernel density estimation (KDE) algorithm to smooth the curve and estimate the biodiversity. In statistics, KDE is a fundamental data smoothing algorithm that can help inferences about the population based on finite data samples.

150 The counts of genera or species of various time slots (visualized as the bins in the charts) are defined as  $(x_1, x_2, \dots, x_n)$ . In statistics, they can be defined as samples drawn from a univariate distribution with an unknown density  $f$ . To estimate the shape of this distribution  $f$ , its kernel density estimator is defined as

$$\hat{f}_h(x) = \frac{1}{n} \sum_{i=1}^n K_h(x - x_i) = \frac{1}{nh} \sum_{i=1}^n K\left(\frac{x - x_i}{h}\right)$$

155 where  $K$  is the kernel function for estimation, we use the Epanechnikov kernel for better smoothing;  $h > 0$  is a smoothing parameter named as bandwidth. For better assessment of the biodiversity changes, we adopt the first derivative of the Continuous Probability Distributions function to estimate the rate of variation.

### 3. Results

#### 160 3.1 Data Overview

This dataset, which was extracted from 126 published papers or books manually, consists of 64 genera and 6025 records, covering all antiarch lineages. The 6025 specimens include 5867 fossil specimens that had been systematically described and documented, and 158 virtual specimens, which were introduced to describe the taxon information when no specimen was assigned for the referred fossil records. The quantities distribution of specimens are given in the supplement. Each specimen has at least one reference within our dataset, and the specimens lacking precise age are excluded. We followed the lithostratigraphic information of the original authors, except we found a revision. We accepted the latest revision in the literature to modify our dataset. The amendments are linked to the latest reference as an endorsement. We took the geological background data in our dataset unless it was missing from the original literature. We transferred the unstructured data from the literature to structured data for further research as detailed as possible. Table 1 shows the framework of our dataset. Among all the referred specimens, 6.51% belong to Yunnanolepidoidei, 2.86% belong to Sinolepidoidei, 78.92% belong to ‘Bothriolepidoidei’, and 11.71% belong to Asterolepidoidei. All the fossil sites of the constituent groups are plotted in Figure 3 and the phylogeny of Antiarcha follows that in Pan et al. (2018).

| Specimen                    |                                              | Reference       |
|-----------------------------|----------------------------------------------|-----------------|
| Specimen ID                 | Genus                                        | Literature type |
| Lithostratigraphy_formation | Species                                      | Title           |
| Lithostratigraphy_member    | Custodian institute                          | Keywords        |
| Fossil site                 | Custodian country                            | Volume          |
| Discovery country           | System / Period                              | Issue           |
| Latitude                    | Series / Epoch                               | Pages           |
| Longitude                   | Stage / Age                                  | Authors         |
| Paleo-latitude              | Reference age to calculate paleo-coordinates | Year            |
| Paleo-longitude             |                                              | Journal         |
|                             |                                              | Doi             |

175

**Table 1 The structure of Antiarcha dataset.**



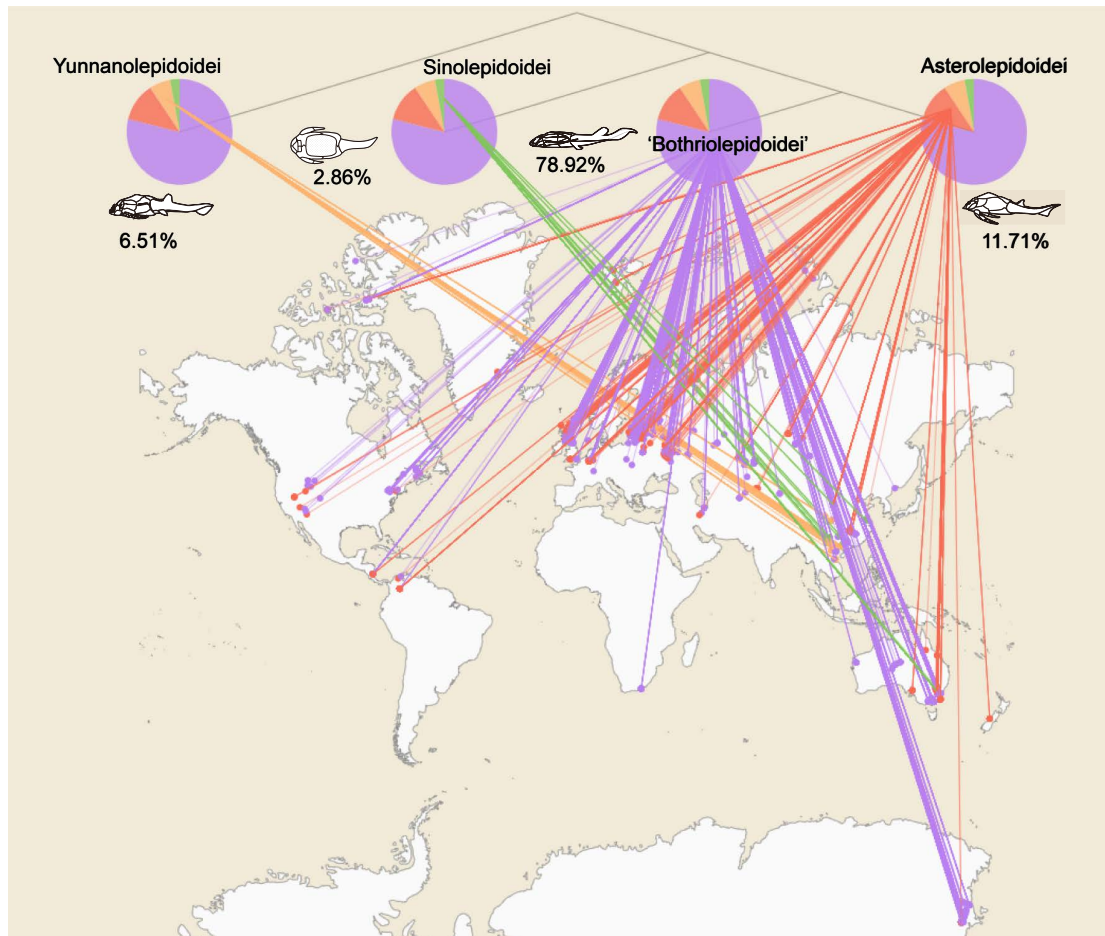

**Figure 3** Graphic abstract of Antiarcha data. The tree topology is simplified from the phylogenetic result in Pan et al. (2018). Numbers under the pie chart represent the relative amounts of specimens of each group. Terminal groups are linked with their geographic distributions. Each node represents a single specimen. Specimens from one locality overlap each other.

180

185

190

No antiarch record was in GBDB. Compared to the 138 records of Antiarcha in the Paleobiology Database (PBDB, 2021-08-12), this is the most comprehensive dataset of Antiarcha up to now (Table 2). Only taxon rank, reference, and occurrence location are available in PBDB. DeepBone dataset has more fields on the structured information of the specimen than that is in the PBDB, like lithostratigraphic fields. Some records in PBDB were not stored at the genus or species level. There are some typing errors in PBDB, for instance, '*Jiangxilepus*', '*Bothriolepidoidei*' and '*Pterichthys*'. *Jiangxilepis*, *Bothriolepidoidei* and *Pterichthyodes* are correct spellings. *Macrodonotophion* is not a genus of Antiarcha, but PBDB adopted it in antiarchs. PBDB also adopted *Silurolepis* as an antiarch ignoring the latest research of Zhu et al. (2019). To ensure accuracy, every specimen of DeepBone was endorsed by the latest publication, and reviewed by the experts who focused on Antiarcha for years. It is open access through the website of the DeepBone database or <https://doi.org/10.5281/zenodo.5639529>.

|                                          | DeepBone Database                                      | Paleobiology Database(PBDB)                                       |
|------------------------------------------|--------------------------------------------------------|-------------------------------------------------------------------|
| Type                                     | specimen-based                                         | fossil-occurrence-based                                           |
| No. of references                        | 355                                                    | 19                                                                |
| No. of genera                            | 64                                                     | 26                                                                |
| No. of species                           | 187                                                    | 98                                                                |
| No. of Specimens/ occurrences            | 6025                                                   | 138                                                               |
| Found in                                 | 2018                                                   | 1998                                                              |
| Websit<br>(last access: 22 October 2021) | <a href="http://www.deepbone.org">www.deepbone.org</a> | <a href="https://paleobiodb.org/#/">https://paleobiodb.org/#/</a> |

**Table 2 The comparison of data of *Antiarcha* in two paleontological databases.**

### 195 3.2 The Geospatial Distribution of the *Antiarcha* Dataset

As for the fossil site distribution, *Yunnanolepidoidei* is endemic in the South China block (comprising southern China and northern Vietnam). *Sinolepidoidei* is limited in South China and Australia (East Gondwana). In contrast, ‘*Bothriolepidoidei*’ and *Asterolepidoidei* are cosmopolitan, especially *Bothriolepis*. The faunistic elements in the communities are used herein at the genus level for their  
200 distributions because many *Bothriolepis* species were described based on isolated plates lacking diagnostic characters (Blicek and Janvier, 1993; Downs, 2011). The heat map of fossil records (Fig. 4) shows that Europe, Australia, and China account for the most records in the world, partly due to their long research history.

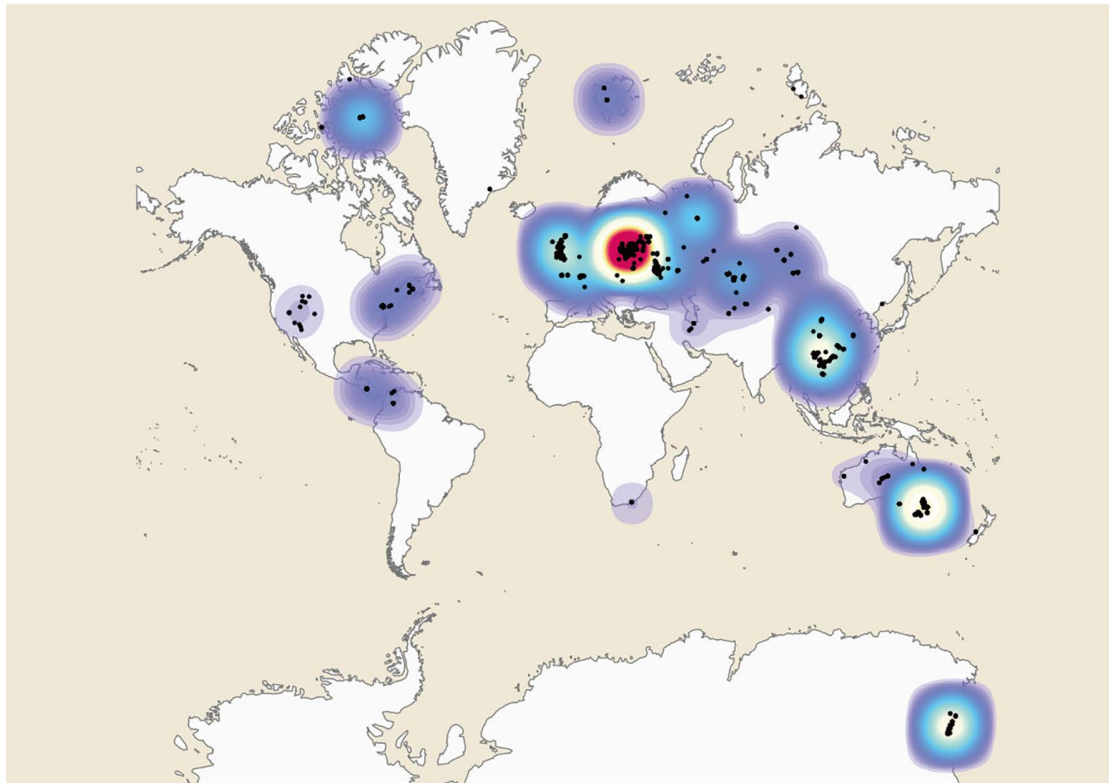

205 **Figure 4 Heat map of Antiarcha fossil sites. Each spot represents a single fossil site.**

As Young (1990a) mentioned that biogeographic data must be interpreted in the context of paleogeographic hypotheses, we plot our data on paleomap (Fig. 5) to generate an outline of their past. The analysis of biogeographic trends in Paleozoic vertebrates is highly dependent on fossil data and paleocontinent reconstruction. Due to the easy access of the paleo-geographic coordinates calculator  
 210 (PointTrack version 7.0) (Ke et al., 2016; Scotese, 2002), we decided to use Scotese’s paleocontinent reconstruction to perform the plot map, although many paleogeographic reconstructions were proposed (Heckel and Witzke, 1979; Li and Powell, 2001; Scotese et al., 1985). The continental reconstructions of Scotese place Baltica, China and Australia in the tropic and subtropic near the equator from Llandovery to Famennian. The timescale follows the International Commission on Stratigraphy  
 215 International Chronostratigraphic Chart version 2021/07.

### 3.3 The Paleogeographic Distribution of the Antiarcha Dataset

We plotted these fossil sites on the paleogeographic map (Fig. 5) except the Silurian *Shimenolepis*, which is the earliest record of Yunnanolepidoidei and the only documented antiarch specimen before the Devonian (Wang, 1991; Zhao et al., 2016). Most of the fossil sites were positioned around the equator.  
 220 In the present scenario, the suborder Yunnanolepidoidei apparently originated as early as Silurian in the

South China block, forming a highly endemic fauna. All fossil sites of Yunnanolepidoidei lied in southern China and northern Vietnam (Wang et al., 2010). From Ludlow (Silurian) to Early Devonian, Yunnanolepidoidei formed dominant antiarchs. Sinolepidoidei and ‘Bothriolepidoidei’ first appeared in Pragian in South China, and Asterolepidoidei first evolved in Emsian in Australia or East Gondwana.

225 During Middle Devonian, along with lessened isolation of South China, Yunnanolepidoidei became extinct. Euantiarcha (‘Bothriolepidoidei’ + Asterolepidoidei) dominated the antiarchs in Middle and Late Devonian, and only a few members of Sinolepidoidei coexisted with them in China and Australia. In Eifelian, Asterolepidoidei suddenly bloomed in Baltica without any clue from the older horizons. The distribution and diversity of Antiarcha reached a peak in Givetian. ‘Bothriolepidoidei’ and

230 Asterolepidoidei represent the main groups of Antiarcha in Givetian, comprising 5 bothriolepidoid genera with 42 fossil locations and 9 asterolepidoid genera with 49 fossil locations. The records of antiarchs decreased in the Pan-Cathaysian and East Gondwana in Late Devonian, contrary to those increased in Baltica. Antiarchs in Baltica went through an independent evolution in Late Devonian.

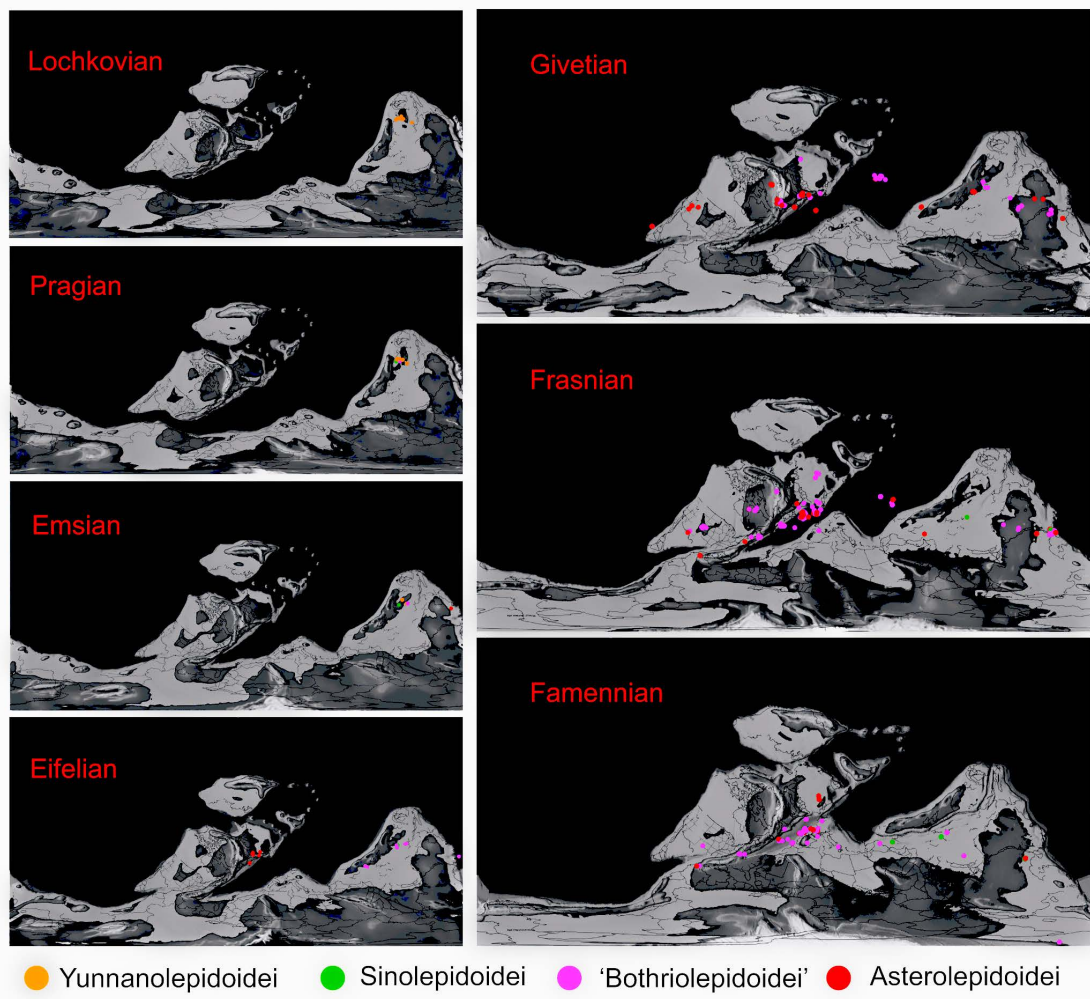

235 **Figure 5 The distributions of Antiarcha during Devonian. Each spot represents the location of one specimen on the paleomap. Specimens from the same locality and the same age overlap each other. The paleo-coordinates are calculated by TrackPoint. Colors denoting respective groups follow Figure 3.**

## 4 Discussion

### 4.1 First Appearance Record

240 The first appearance record of a taxon or a lineage is important in paleontology and evolutionary biology as it renders a hard minimum constrain on molecular clock calibration for a taxon (Benton and Donoghue, 2007; Benton et al., 2009; Donoghue and Benton, 2007). Based on our dataset, the oldest record of yunnanolepidoids or antiarchs is *Shimenolepis graniferus* from the Xiaoxi Formation at Shanmen Reservoir, Lixian County, Hunan, China. *Shimenolepis* was first described as the oldest known placoderm, dated as Telychian of Llandovery (Janvier, 1996; Wang, 1991). However, after a detailed stratigraphic work, Zhao et al. (2016) suggested that the age of *Shimenolepis* is late Ludlow rather than late Llandovery. Janvier and Tông-Dzuy (1998) also documented an indeterminate yunnanolepidoid (Antiarcha gen. sp. indet.) from the Do Son Formation of northern Vietnam, which could be another earliest antiarch potentially.

250 The oldest sinolepid is *Liujiangolepis suni*, from the Nakaoling Formation (Pragian), Xiangzhou, Guangxi, China (Wang, 1987). The oldest bothriolepidid is *Houershanaspis zhangii*, documented from the Danlin Formation (Pragian) in Mt. Houershan, Guizhou, southwestern China, on the basis of a bothriolepid-like anterior median dorsal plate (Lu et al., 2017). The earliest asterolepidoid records are represented by *Wurungulepis* and some disarticulated specimens, which had been documented from the Broken River Formation, Broken River, Australia. The age of the Broken River Formation was first referred to Eifelian, then reassigned to Emsian (*serotinus* Zone) (Burrow, 1996; De Pomeroy, 1996; Young, 1984a, 1990b).

### 4.2 Origin and Differentiation of Euantiarcha

260 *Houershanaspis*, *Wudinolepis*, and *Wufengshania* from Pragian and Emsian represent the earliest members of ‘Bothriolepidoidei’ (Chang, 1965; Lu et al., 2017; Pan et al., 2018), highlighting the origin and early diversification of this group in South China. In Eifelian, the distribution range of ‘Bothriolepidoidei’ extended from South China to Iran that was positioned at the northern margin of East Gondwana with the discovery of *Hyrceanaspis* (Janvier and Pan, 1982). ‘Bothriolepidoidei’ became

cosmopolitan during Givetian and Late Devonian. The earliest asterolepidoid records are from Australia  
265 or East Gondwana in Emsian (Burrow, 1996; Young, 1984a, 1990b). In Eifelian, asterolepidoids  
occurred in Baltica, in addition to East Gondwana. Compared to the abundant Early and Middle Devonian  
fish faunas in South China, asterolepidoids were late arrivals to South China (Young, 1984a) since no  
asterolepidoid was known from this province before Givetian. It could be inferred that Asterolepidoidei  
originated and differentiated in East Gondwana.

### 270 **4.3 Diversity Changes of Antiarcha**

The comprehensive dataset of Antiarcha allows us to generate its diversity changes through its life span.  
We used Kernel Density Estimation to calculate the curves of its biodiversity and variation rate (Fig. 6).  
The curves of biodiversity at genus and species levels were similar except for their peaks. The curve of  
genus-level reached its peak at Givetian, but the curve of species-level reached its peak at Frasnian. Both  
275 curves could identify two sharp risings in diversity in Pridoli and Eifelian. The first rise in Pridoli  
coincided with the rising of the jawed vertebrate and resulted in Yunnanolepidoidei reaching its diversity  
peak in Lochkovian. The velocity rate of the genus level reached its peak at the end of Pridoli. Walliser  
(1996) proposed the E'Em Event as a faunal turnover from endemic taxa to more cosmopolitan ones in  
the transition between Emsian and Eifelian. Changes in the diversity of antiarchs well coincided with the  
280 E'Em Event. After the E'Em Event, the second rising was recognized by a faunal turnover from endemics  
to cosmopolitans (Zhu, 2000). Before this event, *Petalichtyida* and *Antiarcha* were endemic to China  
(Pan et al., 2015). *Wurungulepis* was the only documented antiarch outside China in Early Devonian  
(Young, 1990b). Yunnanolepidoidei was extinct after the E'Em Event, coinciding with the differentiation  
of euantiarchs. The variation rate of species-level reached its peak at the end of Eifelian. Zhu (2000) has  
285 proposed the Late Eifelian Event (Walliser, 1996) for the Chinese placoderm extinction in the late  
Eifelian. Although decreasing in Pan-Cathaysian, the genus and species diversity of *Antiarcha* in other  
parts of the world kept rising after the Late Eifelian Event. Walliser (1995) proposed the Mid-Famennian  
Event is characterized by the increase of the species diversity of *Antiarcha*. On the contrary, our data  
shows that the species diversity of *Antiarcha* underwent the sharpest decrease from Frasnian to  
290 Famennian except for the end of the Devonian. Only the genus diversity of *Antiarcha* increased slightly  
at the beginning of Famennian. Another difference between the two biodiversity curves is that the

decreased genus diversity was in marked contrast to the increased species diversity from Givetian to Frasnian.

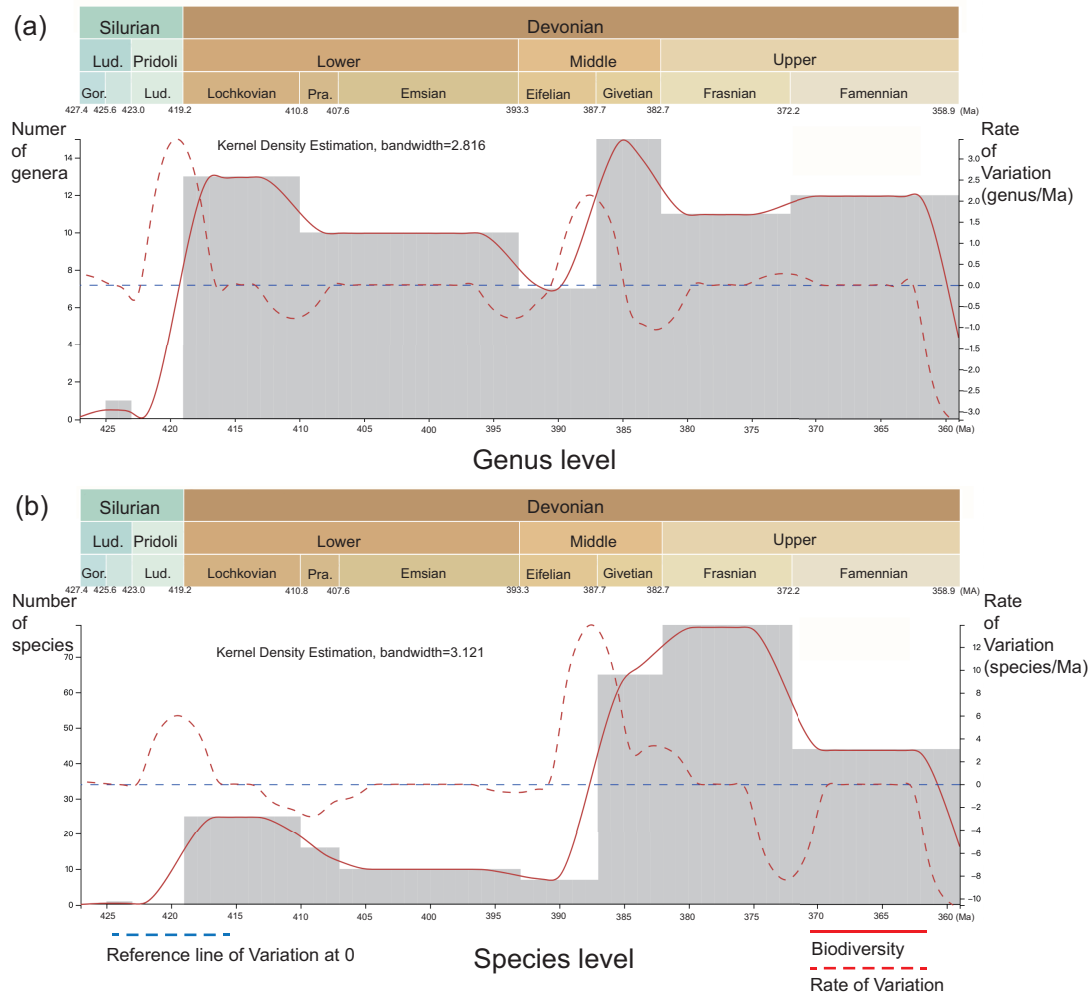

295 **Figure 6 Biodiversity curves of Antiarcha. A, biodiversity curve at genus level. B, biodiversity curve at species level. Histograms indicate the diversity of Antiarcha in each time interval. The continuous red line indicates the biodiversity. The dash red line indicates the rate of variation. The dash blue line is the reference line of Variation at 0. Both red lines are calculated by Kernel Density Estimation.**

### 5 Data Availability

300 The current dataset achieved via Zenodo represents a static version of the dataset in November 2021: <https://doi.org/10.5281/zenodo.5639529> (Pan and Zhu, 2021). The latest version of the dataset is always freely available via <https://deepbone.org/> (last access: 3 November 2021).

### 6 Conclusions

We have manually compiled an open-access dataset of Antiarcha, the most basal jawed vertebrates, from  
 305 the late Silurian to the Late Devonian. Paleontologists, stratigraphers, and evolutionary biologists could

import this tab-delimited file for various purposes, such as biodiversity analysis, stratigraphic correlation, and molecular clock calibration. With the information about 6025 specimens, our dataset is far more comprehensive than the other sources. Data are significant for quantitative analysis and contribute to data-driven scientific research. Previous works of early vertebrates usually focused on anatomy and phylogeny because of their significant impact on the origin and evolution of key characters. Nowadays, new collaborations have focused on biostratigraphy and biogeography, which might throw new light on the study of early vertebrates. Hence, urgent action is required to create a trusted database on early vertebrates.

**Author contributions.** MZ supervised the project. ZHP and ZBN developed the model and performed the simulations. ZHP prepared and revised the manuscript with contributions from MZ and ZBN. ZHP and ZMX prepared the data.

**Competing interests.** The authors declare that they have no conflict of interest.

**Acknowledgement.** We thank Wenjin Zhao, Zhikun Gai, and Tuo Qiao, Institute of Vertebrate Paleontology and Paleoanthropology (CAS); Junxuan Fan, School of Earth Sciences and Engineering, Nanjing University; Honghe Xu, Nanjing Institute of Geology and Palaeontology, Chinese Academy of Sciences (CAS); Junqi Wu, Yaqi Xue, College of Intelligence and Computing, Tianjin University for discussion and help.

**Financial support.** This project was supported by the Strategic Priority Research Program of the Chinese Academy of Sciences (XDA19050102, XDB26000000), National Science Foundation of China (No. 42002015), Youth Innovation Promotion Association CAS (No. 2021070), State Key Laboratory of Palaeobiology and Stratigraphy (Nanjing Institute of Geology and Palaeontology, CAS) (No. 193121).

## Reference



- Battersby, S. E., Finn, M. P., Usery, E. L., and Yamamoto, K. H.: Implications of web Mercator and its  
335 use in online mapping, *Cartographica: J. Geogr. Inf. Geovis.*, 49(2), 85-101, doi:  
10.3138/carto.49.2.2313, 2014.
- Beals, E. W.: Bray-Curtis ordination: an effective strategy for analysis of multivariate ecological data,  
*Adv. Ecol. Res.*, 14, 1-55, doi: 10.1016/S0065-2504(08)60168-3, 1984.
- Benton, M. J. and Donoghue, P. C. J.: Paleontological evidence to date the tree of life, *Mol. Biol. Evol.*,  
340 24(1), 26-53, doi:10.1093/molbev/msl150, 2007.
- Benton, M. J., Donoghue, P. C. J., and Asher, R. J.: Calibrating and constraining molecular clocks, in:  
*The Timetree of Life*, edited by: Hedges, S. B. and Kumar, S., pp.35-86, Oxford Univ. Press, Oxford,  
2009.
- Blicek, A., and Janvier, P.: Silurian-Devonian vertebrate biostratigraphy of Siberia and neighbouring  
345 areas, in: *Palaeozoic Vertebrate Biostratigraphy and Biogeography*, edited by: Long J. A., pp. 87-103,  
Bellhaven Press, London, 1993.
- Blicek, A., Turner, S., and Young, G. C.: Devonian vertebrate biochronology and global marine/non-  
marine correlation, *Cour. Forschungsinst. Senckenberg*, 220, 161-193, 2000.
- Brazeau, M. D.: The braincase and jaws of a Devonian 'acanthodian' and modern gnathostome origins.  
350 *Nature*, 457, 305-308, doi:10.1038/nature07436, 2009.
- Burrow, C. J.: Placoderm scales from the Lower Devonian of New South Wales, Australia, *Mod. Geol.*,  
20, 351-369, 1996.
- Carr, R. K.: Placoderm diversity and evolution. *Bull. Mus. Natl. Hist. Nat., Sect. C*, 17(1-4), 85-125,  
1995.
- 355 Chang, K. J.: New antiarchs from the Middle Devonian of Yunnan, *Vertebr. Palasiat.*, 9(1), 1-9, 1965.
- Davis, S. P., Finarelli, J. A., and Coates, M. I.: *Acanthodes* and shark-like conditions in the last common  
ancestor of modern gnathostomes, *Nature*, 486(7402), 247-250, doi:10.1038/nature11080, 2012.
- De Pomeroy, A. M.: Biostratigraphy of Devonian microvertebrates from the Broken River region, north  
Queensland, *West. Aust. Mus. Rec.*, 17, 417-437, 1996.
- 360 Denison, R.: Placodermi. *Handbook of Paleoichthyology*, vol. 2, 128, 1978.
- Donoghue, P. C. J. and Benton, M.: Rocks and clocks: calibrating the tree of life using fossils and  
molecules, *Trends Ecol. Evol.*, 22(8), 424-431, doi:10.1016/j.tree.2007.05.005, 2007.

- Downs, J. P.: Mass mortality of juvenile antiarchs (*Bothriolepis* sp.) from the Catskill Formation (Upper Devonian, Famennian Stage), Tioga County, Pennsylvania, Proc. Acad. Nat. Sci. Phila., 161, 191-203, 365 2011.
- Dupret, V., Sanchez, S., Goujet, D., Tafforeau, P., and Ahlberg, P. E.: A primitive placoderm sheds light on the origin of the jawed vertebrate face, Nature, 507, 500-503, doi:10.1038/nature12980, 2014.
- Giles, S., Friedman, M., and Brazeau, M. D.: Osteichthyan-like cranial conditions in an Early Devonian stem gnathostome., Nature, 520, 82-85, doi:10.1038/nature14065, 2015.
- 370 Guo, H. D. : Big Earth data: A new frontier in Earth and information sciences, Big Earth Data, 1(1-2), 4-20, doi: 10.1080/20964471.2017.1403062, 2017.
- Heckel, P. H., and Witzke, B. J.: Devonian world palaeogeography determined from distribution of carbonates and related lithic palaeoclimatic indicators, in: The Devonian System, edited by: House M. R., pp. 99-123, Vol. Spec. Pap. Paleontol. 23, 1979.
- 375 Janvier, P. (Ed.): Early Vertebrates, Clarendon Press, Oxford, United States, 1996.
- Janvier, P. and Pan, J.: *Hyrceanaspis bliccki* n.g. n.sp., a new primitive euanthrop (Antiarcha, Placodermi) from the Middle Devonian of northeastern Iran, with a discussion on antiarch phylogeny, Neues. Jahrb. Geol. Palaontol. Abh., 164(3), 364-392, 1982.
- Janvier, P. and Tông-Dzuy, T.: The Silurian and Devonian vertebrates of Viêt Nam: a review, J. Geol., 380 Series B, 1998(11-12), 18-28, 1998.
- Ke, Y., Shen, S. Z., Shi, G. R., Fan, J. X., Zhang, H., Qiao, L., and Zeng, Y.: Global brachiopod palaeobiogeographical evolution from Changhsingian (Late Permian) to Rhaetian (Late Triassic), Paleogeogr. Paleoclimatol. Paleocol., 448, 4-25, doi:10.1016/j.palaeo.2015.09.049, 2016.
- King, B.: Bayesian tip-dated phylogenetics in paleontology: topological effects and stratigraphic fit, Syst. 385 Biol., 70(2), 283-294, doi: 10.1093/sysbio/syaa057, 2021.
- Kohonen, T.: The self-organizing map, P. IEEE, 78(9), 1464-1480, doi: 10.1109/5.58325, 1990.
- Kohonen, T.: The self-organizing map, Neurocomputing, 21(1-3), 1-6, doi: 10.1016/S0925-2312(98)00030-7, 1998.
- Li, Z. X. and Powell, C. M.: An outline of the palaeogeographic evolution of the Australasian region 390 since the beginning of the Neoproterozoic, Earth-Sci. Rev., 53(3-4), 237-277, doi: 10.1016/S0012-8252(00)00021-0, 2001.

- Long, J. A., Mark-Kurik, E., Johanson, Z., Lee, M. S., Young, G. C., Zhu, M., Ahlberg, P. E., Newman, M., Jones, R., Blaauwen, J., Choo, B., and Trinajstić, K.: Copulation in antiarch placoderms and the origin of gnathostome internal fertilization, *Nature*, 517, 196-199, doi:10.1038/nature13825, 2015.
- 395 Lu, L., Tan, K., and Wang, X.: A New Antiarchi (placoderm fishes) from Devonian Strata of Dushan, Guizhou Province, *Acta Geosci. Sin.*, 38(2), 144-148, 2017.
- Lukševičs, E.: Bothriolepid antiarchs (Placodermi, Bothriolepididae) from the north-western part of East European platform, Ph.D. thesis, Ģeogrāfijas un Zemes zinātņu fakultāte, University of Latvia, Latvia, 196 pp., 1996.
- 400 Pan, J., Lu, L., and Ji, S. A.: A brief review of studies on palaeogeography of Middle Paleozoic vertebrates in China, *J. Southeast Asian Earth Sci.*, 13(3-5), 185-190, 1996.
- Pan, Z. H., Zhu, M., Zhu, Y. A., and Jia, L. T., A new petalichthyid placoderm from the Early Devonian of Yunnan, China, *C. R. Palevol*, 14(2), 125-137. doi:10.1016/j.crpv.2014.10.006, 2015.
- Pan, Z. H., and Zhu, M. VPPDB: Hosting the data for vertebrate paleoanthropology, *Acta Geol. Sin.-Engl.*, 93(supp.1), 61-63, doi: 10.1111/1755-6724.14246, 2019.
- 405 Pan, Z. H., Zhu, M., Zhu, Y. A., and Jia, L. T.: A new antiarch placoderm from the Emsian (Early Devonian) of Wuding, Yunnan, China, *Alcheringa*, 42, 10-21, doi:10.1080/03115518.2017.1338357, 2018.
- Pan, Z. H. and Zhu, M. Dataset of antiarch placoderms (the most basal jawed vertebrates) throughout Middle Paleozoic (Version 31-Aug-2021), Zenodo, 10.5281/zenodo.5347006, 2021.
- 410 Qiao, T., King, B., Long, J. A., Ahlberg, P. E., and Zhu, M.: Early gnathostome phylogeny revisited: multiple method consensus, *PLoS One*, 11(9), e0163157, doi:10.1371/journal.pone.0163157, 2016.
- Ricotta, C. and Podani, J.: On some properties of the Bray-Curtis dissimilarity and their ecological meaning, *Ecol. Complex.*, 31, 201-205, doi: 10.1016/j.ecocom.2017.07.003, 2017.
- 415 Ritchie, A., Wang, S. T., Young, G. C., and Zhang, G. R.: The Sinolepidae, a family of antiarchs (placoderm fishes) from the Devonian of South China and eastern Australia, *Rec. Aust. Mus.*, 44(3), 319-370, doi:10.3853/j.0067-1975.44.1992.38, 1992.
- Sallan, L., Friedman, M., Sansom, S. R., Bird, M. C., and Sansom, J. I.: The nearshore cradle of early vertebrate diversification, *Science*, 362, 460-464, doi: 10.1126/science.aar3689, 2018.
- 420 Scotese, C. R.: The PALEOMAP Project: paleogeographic atlas and plate tectonic software, *Oceanographic Literature Review*, 3(45), 606-607, 1998.

- Scotese, C. R.: Palaeo Map Project, <http://www.scotese.com>, last access: 31 August 2021.
- Scotese, C. R.: Tutorial: PALEOMAP paleoAtlas for GPlates and the paleoData plotter program, Technical Report, 56, <https://www.earthbyte.org/paleomap>, last access: 31 August 2021.
- 425 Scotese, C. R., Voo, R. V., and Barrett, S. F.: Silurian and Devonian base maps [and Discussion], *Philos. Trans. R. Soc. Lond. Ser. B. Sci.*, 309(1138), 57-77, 1985.
- Trinajstić, K., Boisvert, C., Long, J., Maksimenko, A., and Johanson, Z.: Pelvic and reproductive structures in placoderms (stem gnathostomes), *Biol. Rev.*, 90(2), 467-501, doi:10.1111/brv.12118, 2015.
- Vesanto, J., and Alhoniemi, E.: Clustering of the self-organizing map, *IEEE Trans. Neural Netw. Learn. Syst.*, 11(3), 586-600, doi: 10.1109/72.846731, 2000.
- 430 Walliser, O.H.: Global events in the Devonian and Carboniferous, in: *Global events and event stratigraphy in the Phanerozoic*, edited by: Walliser O.H., pp. 225-250, Springer, Berlin, Heidelberg, New York, 1996.
- Wang, J. Q.: The Antiarchi from Early Silurian of Hunan, *Vertebr. Palasiat.*, 29(3), 240-244, 1991.
- 435 Wang, S. T.: A new antiarch from the Early Devonian of Guangxi, *Vertebr. Palasiat.*, 25, 81-90, 1987.
- Wang, W., Qu, Q. M., and Zhu, M.: A brief review of the Middle Palaeozoic vertebrates from Southeast Asia, *Palaeoworld*, 19(1-2), 27-36, doi:10.1016/j.palwor.2009.12.005, 2010.
- Xu, H. H., Niu, Z. B., and Chen, Y. S.: A status report on a section-based stratigraphic and palaeontological database the Geobiodiversity Database, *Earth Syst. Sci. Data*, 12, 3443–3452, doi: 10.5194/essd-12-3443-2020, 2020.
- 440 Young, G. C.: Stratigraphic occurrence of some placoderm fishes in the Middle and Late Devonian, *Newsl. Stratigr.*, 243-261, 1974.
- Young, G. C.: An asterolepidoid antiarch (placoderm fish) from the Early Devonian of the Georgina Basin, central Australia, *Alcheringa*, 8, 65-80, 1984a.
- 445 Young, G. C.: Comments on the phylogeny and biogeography of antiarchs (Devonian placoderm fishes), and the use of fossils in biogeography, *Proc. Linn. Soc. N. S. W.*, 107(3), 443-473, 1984b.
- Young, G. C.: Antiarchs (placoderm fishes) from the Devonian Aztec siltstone, southern Victoria Land, Antarctica, *Palaeontogr. Abt. A*, 202, 1-125, 1988.
- Young, G. C.: Devonian vertebrate distribution patterns and cladistic analysis of palaeogeographic hypotheses, *Geol. Soc. Lond., Mem.*, 12(1), 243-255, doi:10.1144/gsl.mem.1990.012.01.23, 1990a.
- 450

- Young, G. C.: New antiarchs (Devonian placoderm fishes) from Queensland, with comments on placoderm phylogeny and biogeography, *Mem. Queensland Mus.*, 28(1), 35-50, 1990b.
- Young, G. C.: Placoderms (armored fish): dominant vertebrates of the Devonian period, *Annu. Rev. Earth Pl. Sc.*, 38(1), 523-550, doi:10.1146/annurev-earth-040809-152507, 2010.
- 455 Young, G. C., Burrow, C. J., Long, J. A., Turner, S., and Choo, B.: Devonian macrovertebrate assemblages and biogeography of East Gondwana (Australasia, Antarctica), *Palaeoworld*, 19, 55-74, doi: 10.1016/j.palwor.2009.11.005, 2010.
- Young, G. C. and Lu, J.: Asia-Gondwana connections indicated by Devonian fishes from Australia: palaeogeographic considerations, *J. Palaeogeogr.*, 9(8), 1-22, doi:10.1186/s42501-020-00057-x, 2020.
- 460 Zhao, W. J., Zhu, M., Liu, S., Pan, Z. H., and Jia, L. T.: A new look at the Silurian fish-bearing strata around the Shanmen Reservoir in Lixian, Hunan province, *J. Stratigr.*, 40(4), 341-350, 2016.
- Zhu, M.: The phylogeny of the Antiarcha (Placodermi, Pisces), with the description of Early Devonian antiarchs from Qujing, Yunnan, China, *Bull. Mus. Natl. Hist. Nat., Sect. C*, 18, 233-347, 1996.
- Zhu, M.: Catalogue of Devonian vertebrates in China, with notes on bio-events, *CFS, Cour. Forschunsinst. Senckenberg*, 223, 373-390, 2000.
- 465 Zhu, M., Ahlberg, P. E., Pan, Z. H., Zhu, Y. A., Qiao, T., Zhao, W. J., Jia, L. T., and Lu, J.: A Silurian maxillate placoderm illuminates jaw evolution, *Science*, 354(6310), 334-336, doi:10.1126/science.aah3764, 2016.
- Zhu, M., Yu, X. B., Ahlberg, P. E., Choo, B., Lu, J., Qiao, T., Qu, Q. M., Zhao, W. J., Jia, L. T., Blom, H., and Zhu, Y. A.: A Silurian placoderm with osteichthyan-like marginal jaw bones, *Nature*, 502(7470), 188-193, doi:10.1038/nature12617, 2013.
- 470 Zhu, Y. A., Lu, J., and Zhu, M.: Reappraisal of the Silurian placoderm *Silurolepis* and insights into the dermal neck joint evolution, *R. Soc. Open Sci.*, 6(9), 191181, doi: 10.1098/rsos.191181, 2019.
- Zigaite, Z. and Blicek, A.: Chapter 28 Palaeobiogeography of Early Palaeozoic vertebrates, *Geol. Soc. Lond., Mem.*, 38(1), 449-460, doi:10.1144/m38.28, 2013.
- 475
